# Supplementary material
Source: publisher figshare collection journal article supplement (https://gsajournals.figshare.com/ndownloader/files/13667150)
Supplement: Supplementary file 1 [file 13667150]

## Table S1

| **Explanation** | **Read** | **length(bp)** | **Clean bases** | **Q20 (%)** | **GC (%)** |
| --- | --- | --- | --- | --- | --- |
| Domesticated_High_1 | 46075138 | 46075138 | 99.37 | 99.1 | 49.66 |
| Domesticated_High_2 | 46697118 | 46697118 | 99.38 | 99.11 | 49.85 |
| Domesticated_High_3 | 44622780 | 44622780 | 98.87 | 99.12 | 50.73 |
| Domesticated_Low_1 | 46441522 | 46441522 | 99.39 | 99.09 | 50.24 |
| Domesticated_Low_2 | 46838422 | 46838422 | 99.38 | 99.1 | 50.02 |
| Domesticated_Low_3 | 46794464 | 46794464 | 99.4 | 99.13 | 49.69 |
| Wild_High_1 | 44578618 | 44578618 | 99.32 | 99.07 | 50.5 |
| Wild_High_2 | 45084660 | 45084660 | 99.4 | 99.11 | 50.22 |
| Wild_High_3 | 46410466 | 46410466 | 99.35 | 98.88 | 45.73 |
| Wild_Low_1 | 45726408 | 45726408 | 99.33 | 99.01 | 49.76 |
| Wild_Low_2 | 46485580 | 46485580 | 99.37 | 99.04 | 50.47 |
| Wild_Low_3 | 44561442 | 44561442 | 99.41 | 99.01 | 50.32 |
